# Supplementary material
Source: PubMed Central journal article supplement (PMC59754)
Supplement: pnas_211253898_2.pdf [file pnas_211253898_2.pdf]

Supporting information for Spåhr *et al.* (September 25, 2001) *Proc. Natl. Acad. Sci. USA*, 10.1073/pnas.211253898.

**Table 3. Primers used in this study**

| Gene                     | Primer | Sequence                                                    |
|--------------------------|--------|-------------------------------------------------------------|
| <i>med4</i> <sup>+</sup> | med4w  | 5'-GAGATATCTAATTCAGTAGTATG-3'                               |
|                          | med4x  | 5'-GGGGATCCGTCGACCTGCAGCGTACGATGGGGAGCATATGTGACTACTAT-3'    |
|                          | med4y  | 5'-GTTTAAACGAGCTCGAATTCATCGATTTCTAAATTGTGTTATTTGTCAAGTG-3'  |
|                          | med4z  | 5'-CTCATATGACATGGACGATGTCGAATG-3'                           |
| <i>med7</i> <sup>+</sup> | med7w  | 5'-GGCATTCAACAATAGCGATAAGC-3'                               |
|                          | med7x  | 5'-GGGGATCCGTCGACCTGCAGCGTACGACTCTTTTAGTTAAATAGTATTTATCG-3' |
|                          | med7y  | 5'-GTTTAAACGAGCTCGAATTCATCGATTAAACCGTTTATCTAGTAGAG-3'       |
|                          | med7z  | 5'-CTGGTATGGTCATTTATCCTAAG-3'                               |
| <i>srb4</i> <sup>+</sup> | srb4w  | 5'-CCCGTTTATGCCCATACCGGTGATG-3'                             |
|                          | srb4x  | 5'-GGGGATCCGTCGACCTGCAGCGTACGAAATTCCTATGTGCATTAGGATATG-3'   |
|                          | srb4y  | 5'-GTTTAAACGAGCTCGAATTCATCGATTTATGATGCCGCCTCTAATCAACCG-3'   |
|                          | srb4z  | 5'-CACGTAATCATATAAAAACACAAAGC-3'                            |
| <i>pmc2</i> <sup>+</sup> | pmc2w  | 5'-CCACTTCTGAAAGGGCACGC-3'                                  |
|                          | pmc2x  | 5'-GGGGATCCGTCGACCTGCAGCGTACGAGTAAATTAGTCGTGTATTTTCGTAT-3'  |
|                          | pmc2y  | 5'-GTTTAAACGAGCTCGAATTCATCGATAATTTTCATGCTAGAAAAAGACATTAC-3' |
|                          | pmc2z  | 5'-GGTACTCTTGGAGATTTATCAG-3'                                |
| <i>pmc3</i> <sup>+</sup> | pmc3w  | 5'-GGCCGGTTTCGACGTATCCAAAC-3'                               |
|                          | pmc3x  | 5'-GGGGATCCGTCGACCTGCAGCGTACGATTCTGGTAGCCTTAACAAACTTAA-3'   |
|                          | pmc3y  | 5'-GTTTAAACGAGCTCGAATTCATCGATAACACTAATTTTGATATTCAAATGAAA-3' |
|                          | pmc3z  | 5'-GTTTCGTAAAGTAATCGGATTTG-3'                               |
